# Supplementary material for: Laser Desorption/Ionization Mass Spectrometry as a Potential Tool for Evaluation of Hydroxylation Degree of Various Types of Titanium Dioxide Materials
Source: Materials (Basel). 2021 Nov 13;14(22):6848. doi: 10.3390/ma14226848 (PMC8619251; doi:10.3390/ma14226848)
Supplement: Supplementary file 1 [file materials-14-06848-s001.zip › materials-1408989-supplementary.pdf]

Supplementary Material

# Laser Desorption/Ionization Mass Spectrometry as a Potential Tool for Evaluation of Hydroxylation Degree of Various Types of Titanium Dioxide Materials

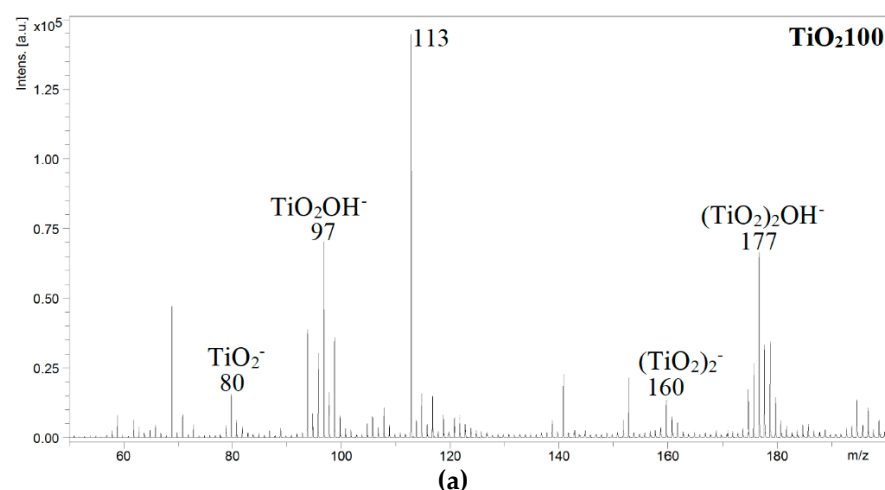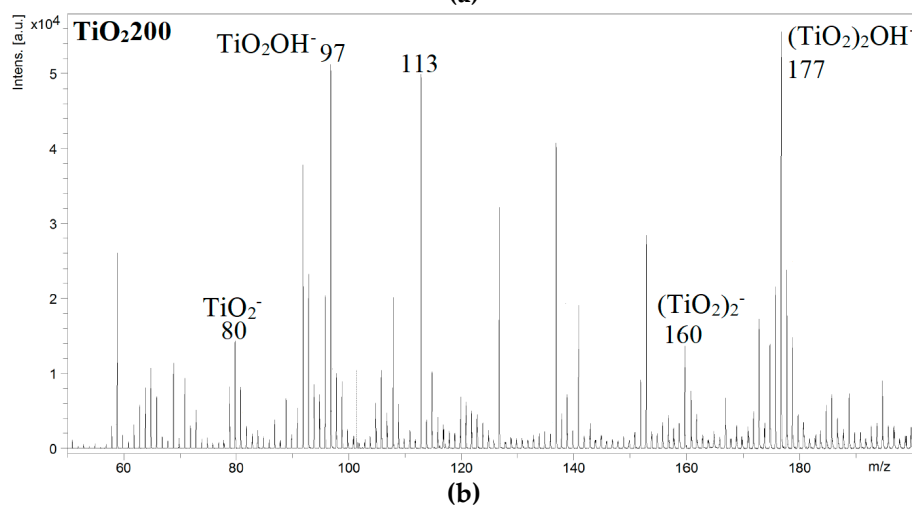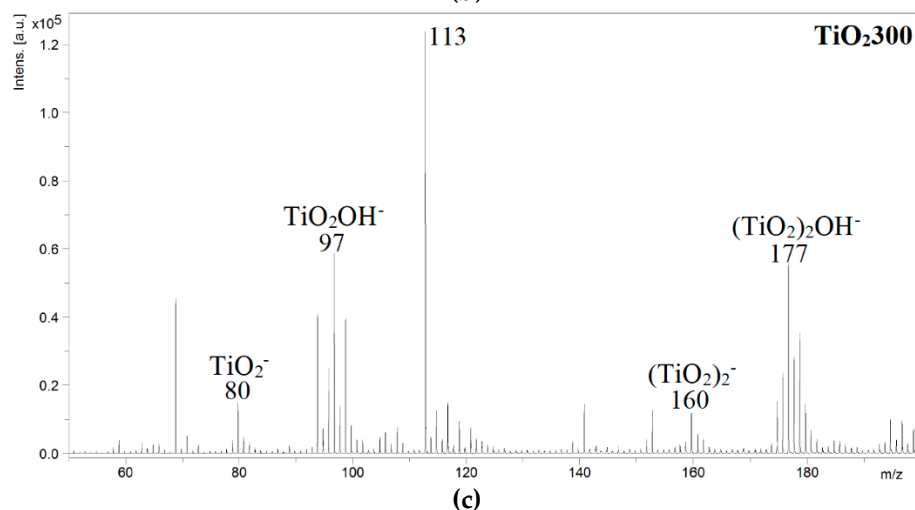

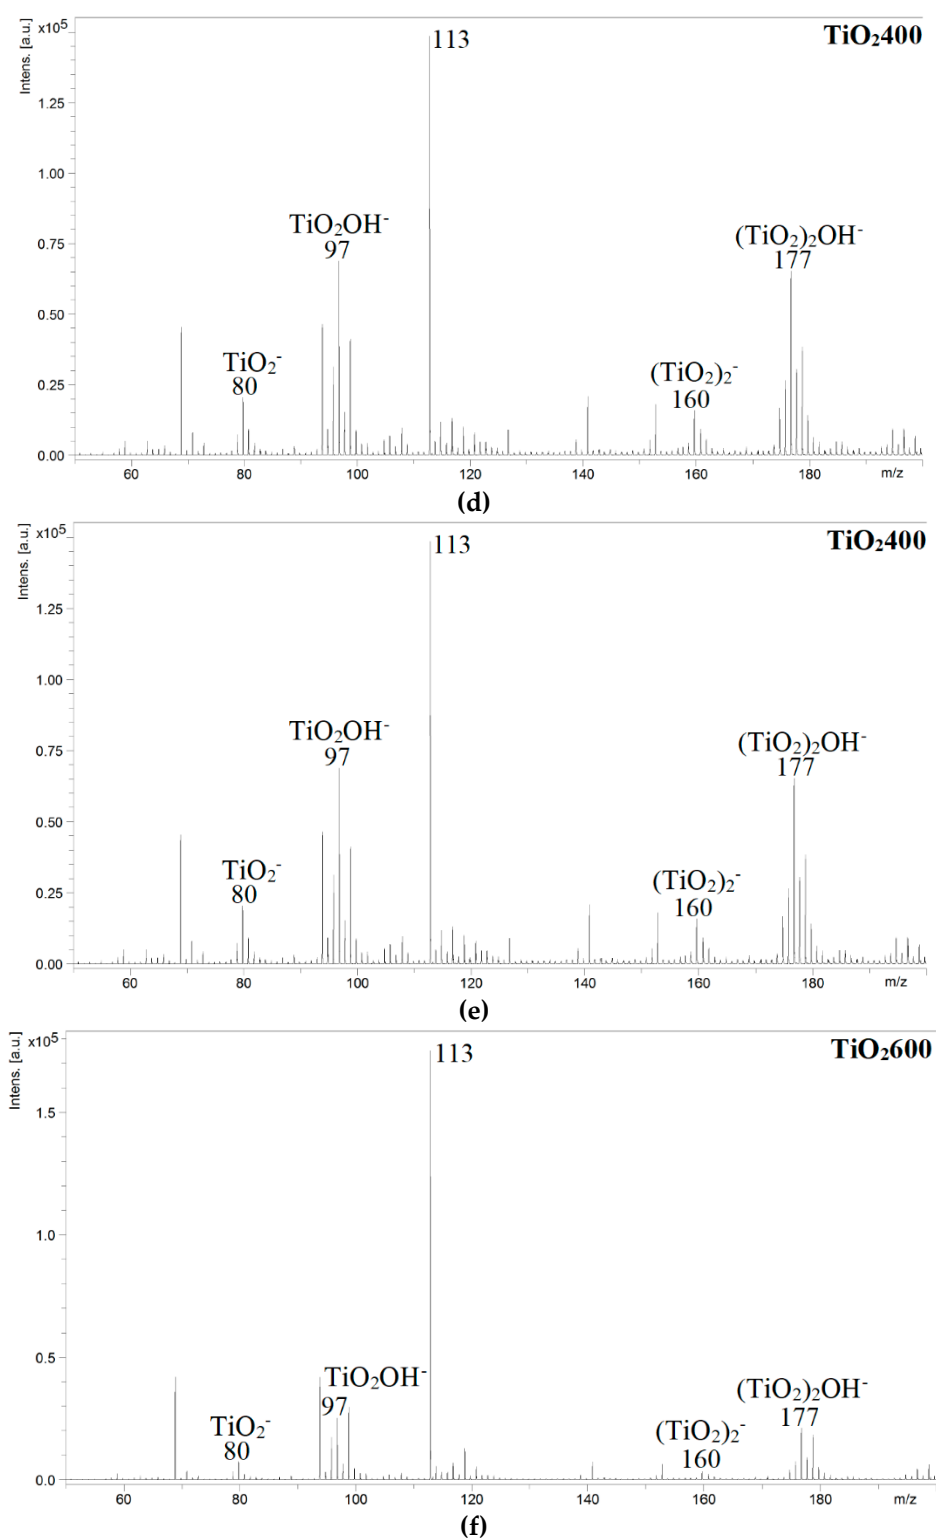

**Figure S1.** LDI mass spectra of TiO<sub>2</sub> samples, obtained in the negative ion mode, in the *m/z* range 50–200, (a) TiO<sub>2</sub>100, (b) TiO<sub>2</sub>200, (c) TiO<sub>2</sub>300, (d) TiO<sub>2</sub>400, (e) TiO<sub>2</sub>500, (f) TiO<sub>2</sub>600.

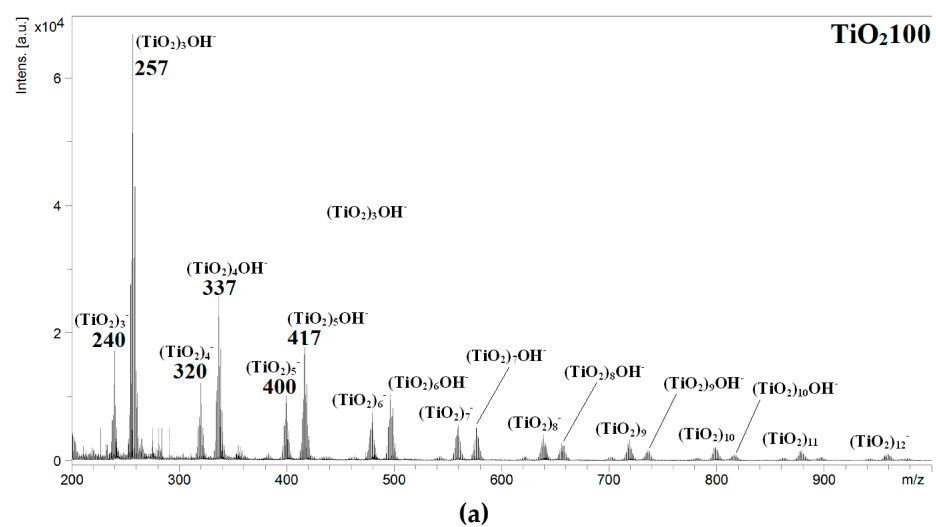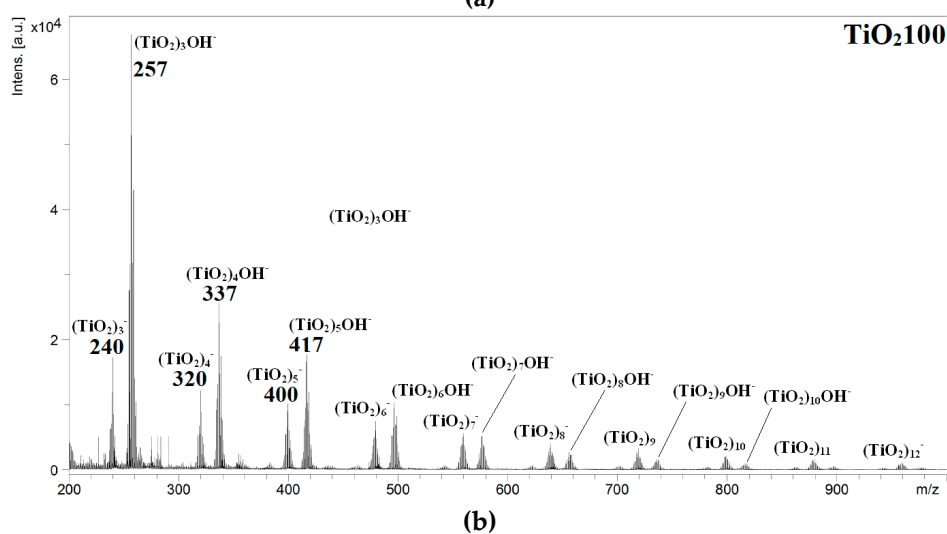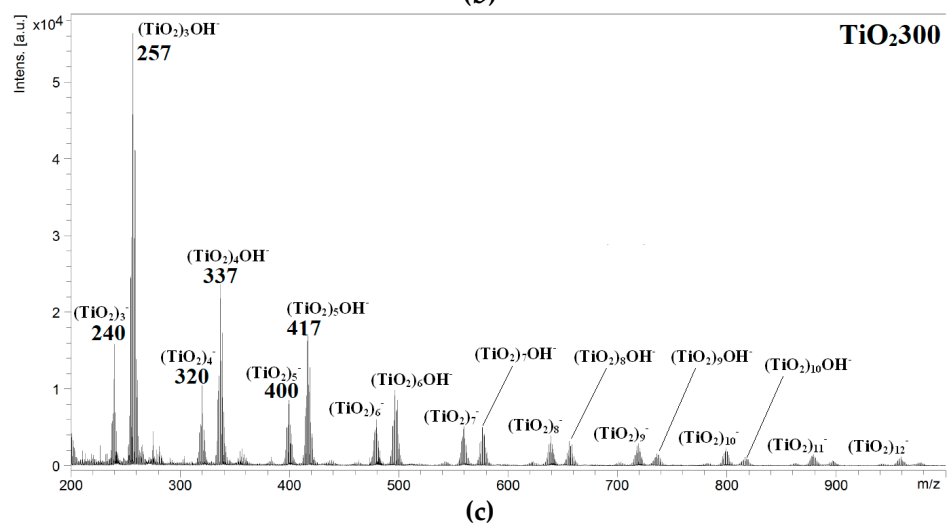

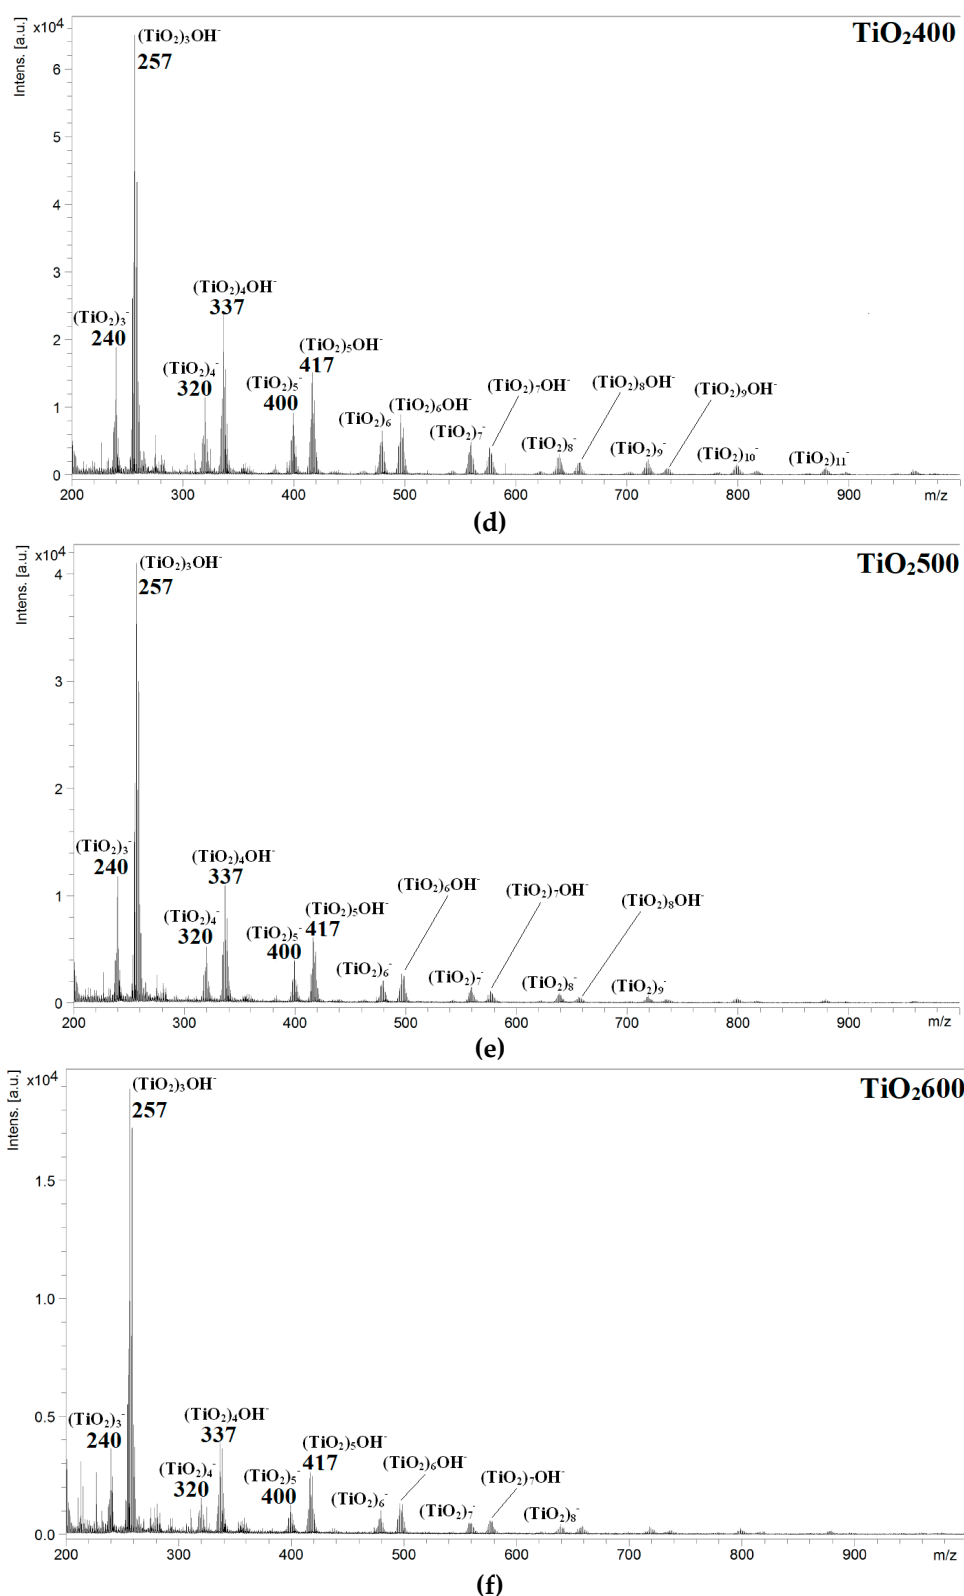

**Figure S2.** LDI mass spectra of TiO<sub>2</sub> samples, obtained in the negative ion mode, in the *m/z* range 200–1000, (a) TiO<sub>2</sub>100, (b) TiO<sub>2</sub>200, (c) TiO<sub>2</sub>300, (d) TiO<sub>2</sub>400, (e) TiO<sub>2</sub>500, (f) TiO<sub>2</sub>600.

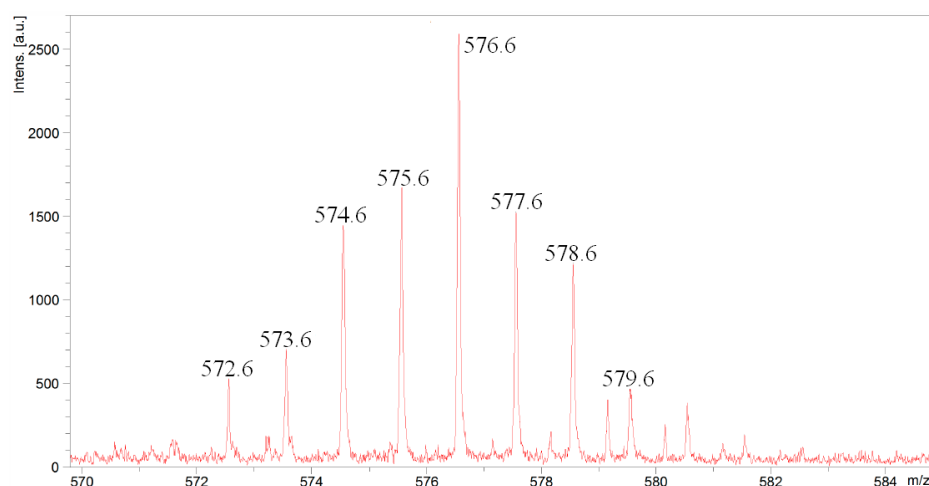

**Figure S3.** The obtained isotope pattern of  $(\text{TiO}_2)_7\text{OH}^-$  ion, shown as a representative example. There is no doubt that we deal with the  $(\text{TiO}_2)_7\text{OH}^-$  ion and not with the  $(\text{TiO}_2)_7\text{H}_2\text{O}^-$  one (<https://www.sisweb.com/mstools/isotope.htm>).

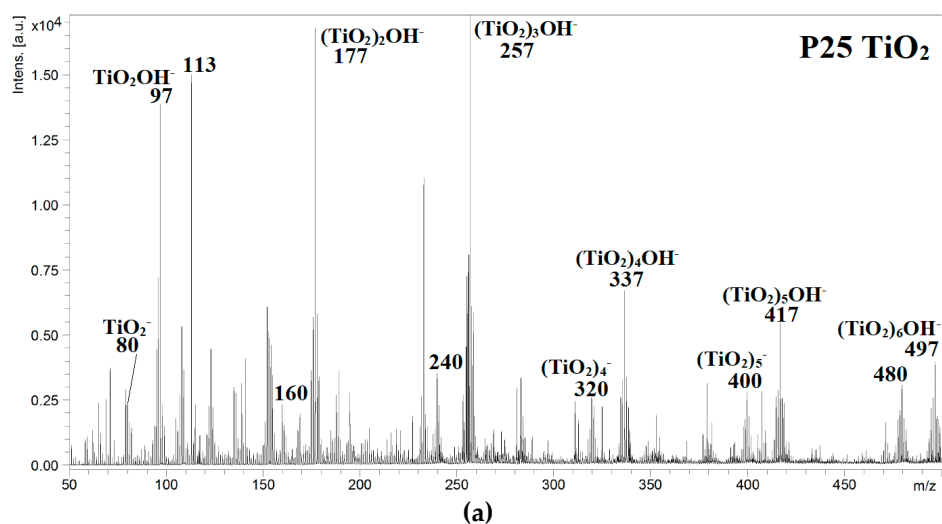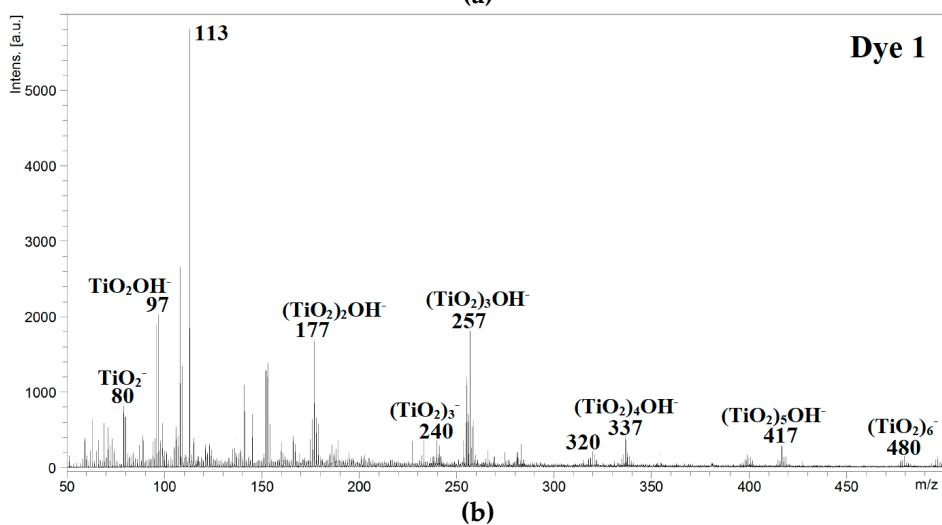

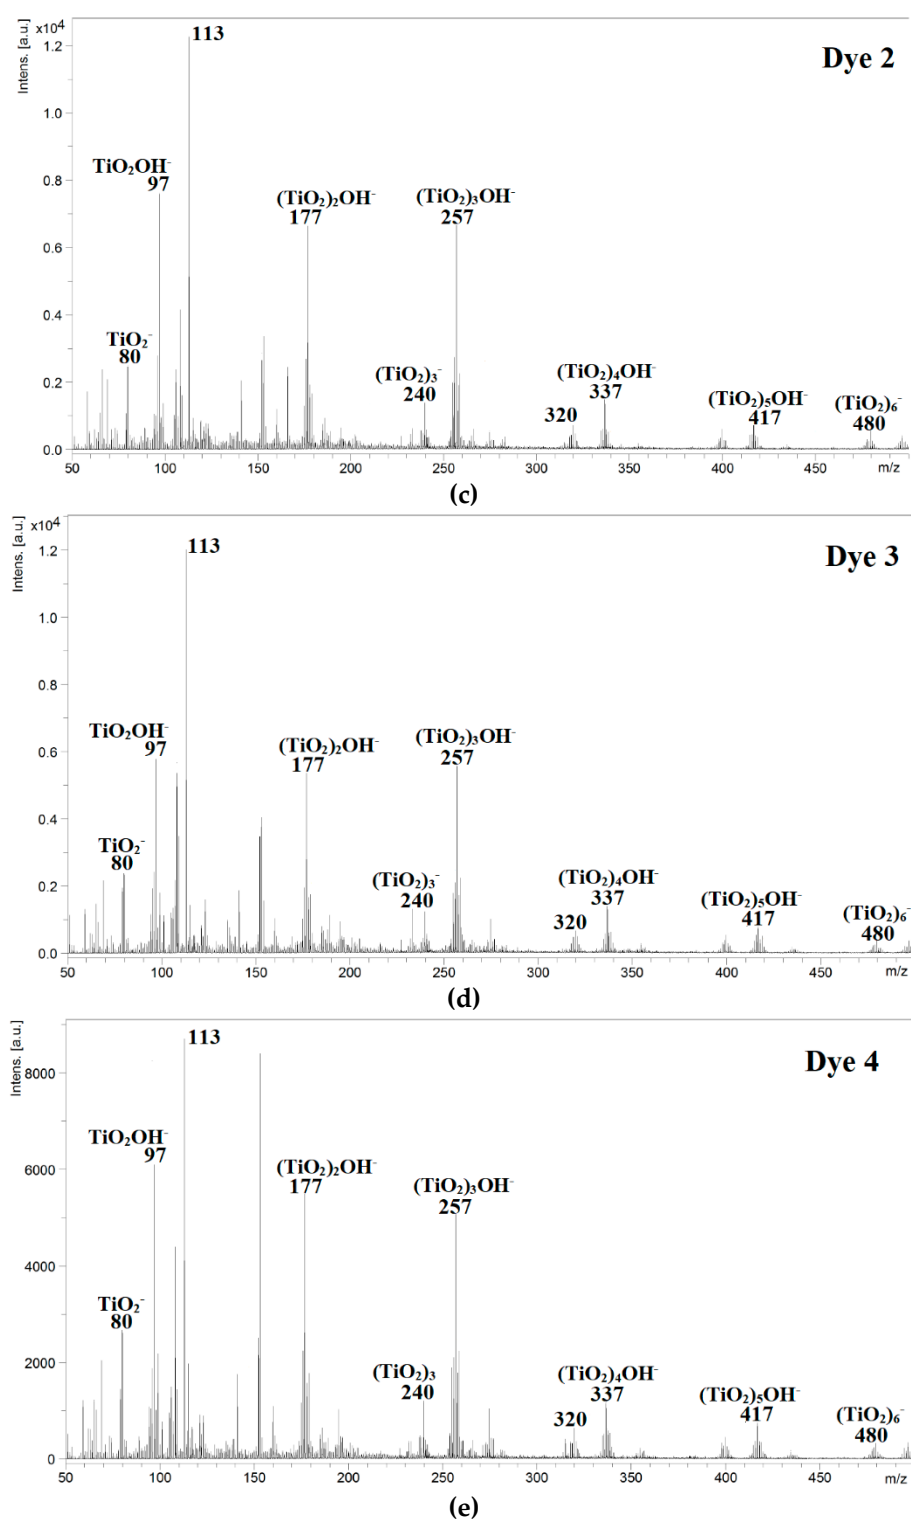

**Figure S4.** LDI mass spectra of the unmodified P25  $\text{TiO}_2$  and dye-modified samples, (a) P25  $\text{TiO}_2$ , (b) Dye 1, (c) Dye 2, (d) Dye 3, (e) Dye 4.

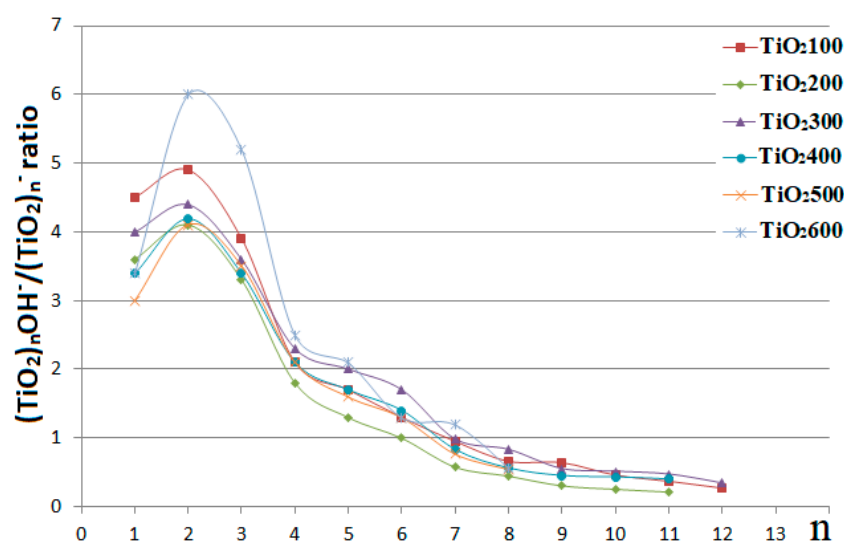

**Figure S5.** The breakdown plots of the  $(\text{TiO}_2)_n\text{OH}^-/(\text{TiO}_2)_n^-$  ratio against the  $n$  number obtained for heated  $\text{TiO}_2$  samples.

Since for  $\text{TiO}_2500$  and  $\text{TiO}_2600$ , the ions at high  $m/z$  range are low abundant – Figure S2, the ratios for these ions are not included in the plots. The obtained plots are similar, however, not identical. Some of the plots can be used for the comparison/differentiation of the  $\text{TiO}_2$  samples, e.g., the  $\text{TiO}_2100$  and  $\text{TiO}_2600$  plots are different than other plots for  $n \leq 4$ , the  $\text{TiO}_2200$  plot is different than other plots for  $n > 4$ , however, no comparison of the hydroxylation degree can be performed. For example the hydroxylation degree of  $\text{TiO}_2500$  and  $\text{TiO}_2600$  is similar, however, the latter plot, for  $n = 1-3$ , has a significantly different course than the former plot; for  $n \geq 3$ , the  $(\text{TiO}_2)_n\text{OH}^-/(\text{TiO}_2)_n^-$  ratios obtained for  $\text{TiO}_2200$  have the lowest values. It is worth adding that  $\text{TiO}_2200$  has very specific properties, e.g. different UV absorption than the other  $\text{TiO}_2$  samples, due to the carbon deposit [25]. However the carbon deposit does not absorb the IR light, therefore it does not affect the FTIR spectrum shown in Figure 1 in the manuscript. In other words, not only hydroxylation degree significantly affects the  $(\text{TiO}_2)_n\text{OH}^-/(\text{TiO}_2)_n^-$  ratio.

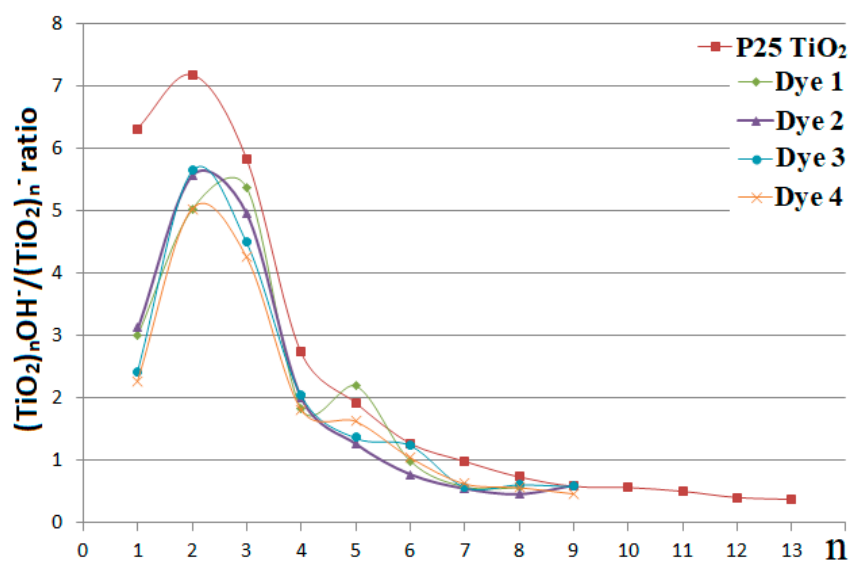

**Figure S6.** The breakdown plots of the  $(\text{TiO}_2)_n\text{OH}^-/(\text{TiO}_2)_n^-$  ratio against the  $n$  number obtained for the unmodified P25  $\text{TiO}_2$  and dye-modified samples.

It is clear that for  $n = 1-3$ , the plot obtained for the unmodified P25  $\text{TiO}_2$  samples has a significantly different course than the other plots which have similar courses. Therefore,

if  $\text{TiO}_2$  samples differ only by the hydroxylation degree, the  $(\text{TiO}_2)_n\text{OH}/(\text{TiO}_2)_n$  ratio depends on the free hydroxyl group population and can be used for comparison of the hydroxylation degree of  $\text{TiO}_2$  samples.

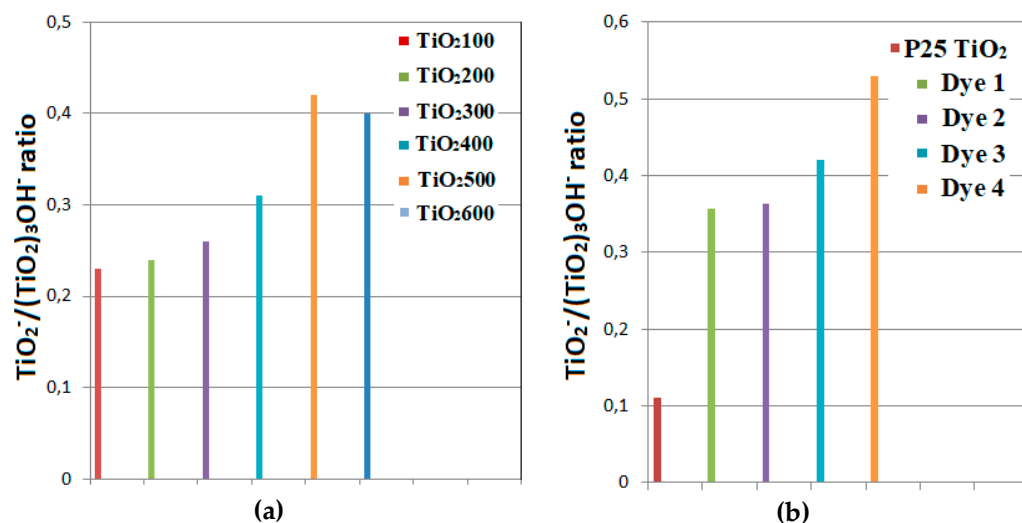

**Figure S7.** The  $\text{TiO}_2/(\text{TiO}_2)_3\text{OH}^-$  ratios obtained for heated  $\text{TiO}_2$  samples (a), unmodified (P25  $\text{TiO}_2$ ) and dye-modified samples (b).

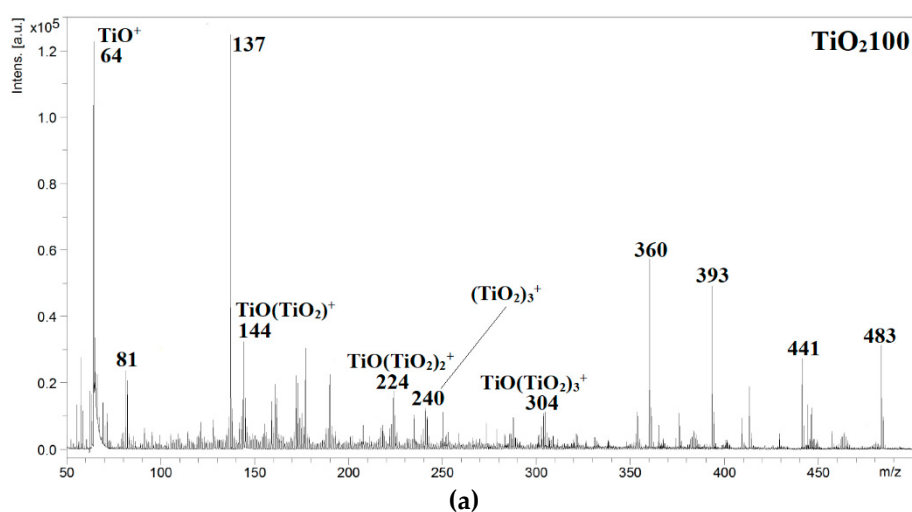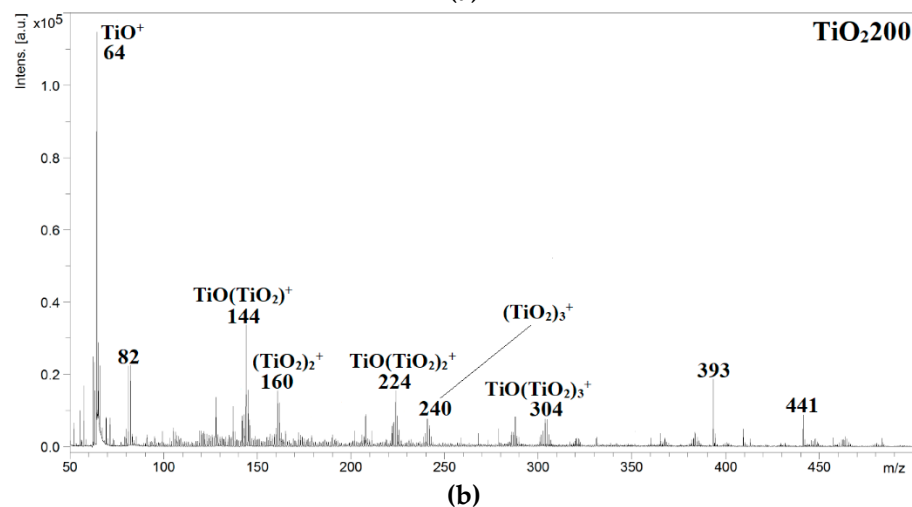

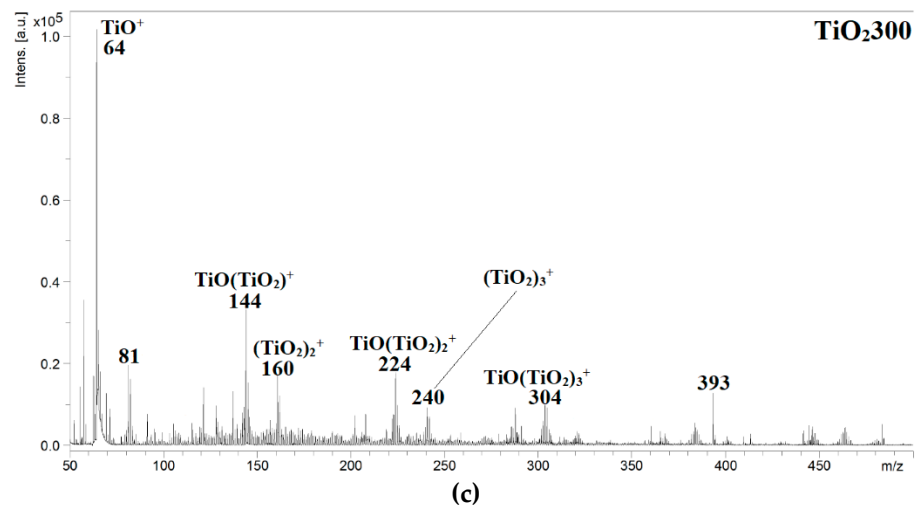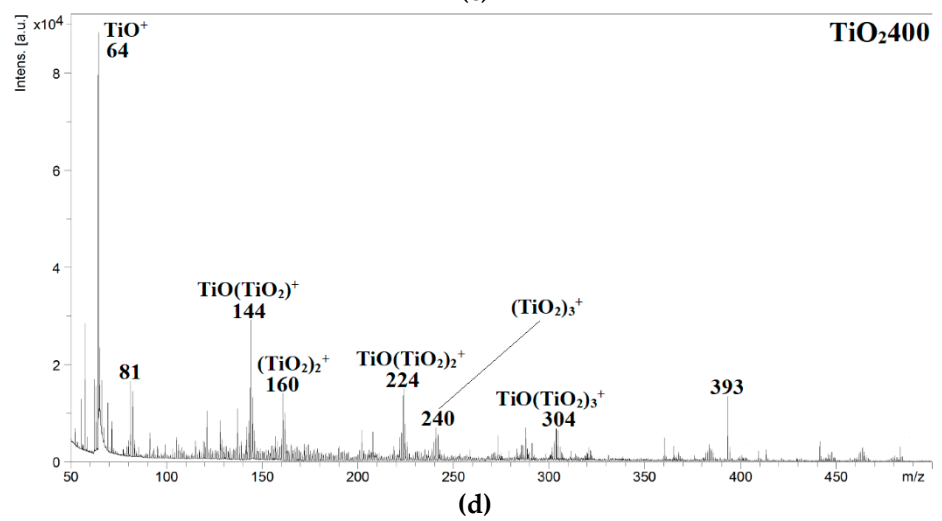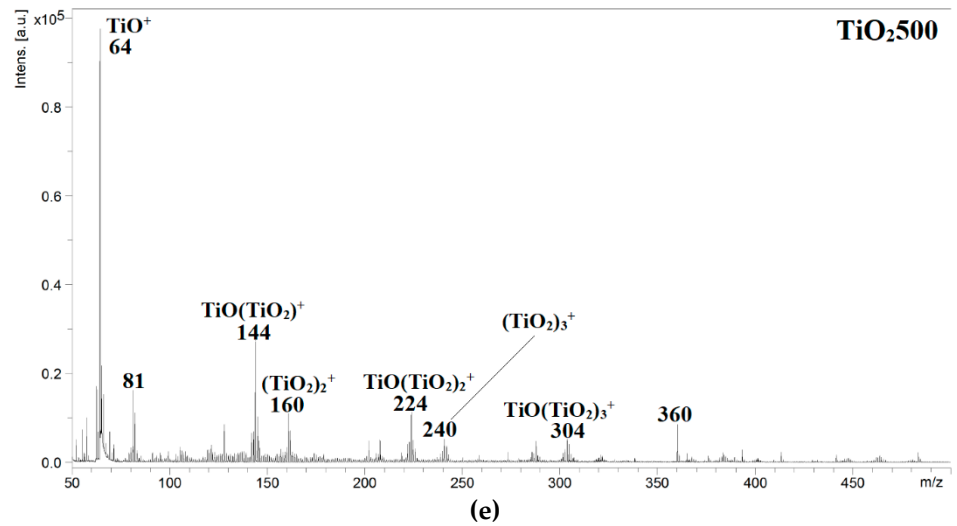

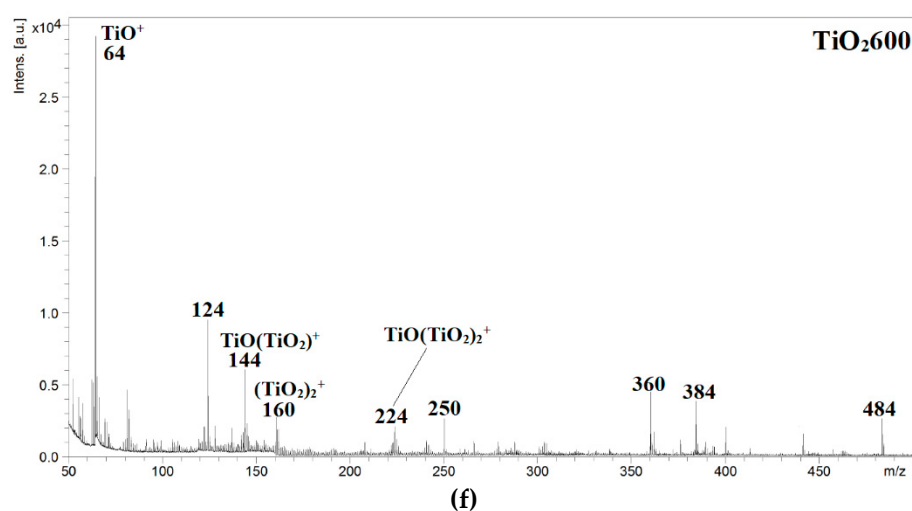

**Figure S8.** LDI mass spectra of  $\text{TiO}_2$  samples obtained in the positive ion mode, (a)  $\text{TiO}_2100$ , (b)  $\text{TiO}_2200$ , (c)  $\text{TiO}_2300$ , (d)  $\text{TiO}_2400$ , (e)  $\text{TiO}_2500$ , (f)  $\text{TiO}_2600$ .

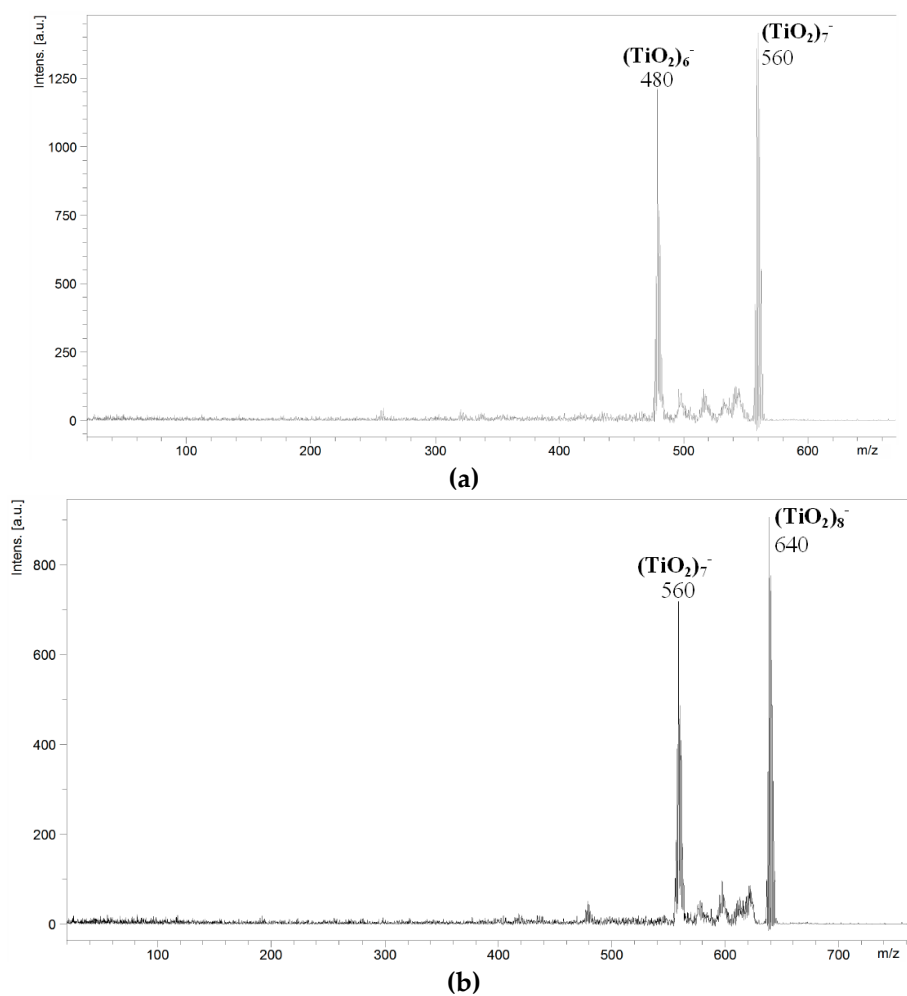

**Figure S9.** Exemplary LIFT mass spectra of  $(\text{TiO}_2)_n^-$  ions. The selected parent ions were  $(\text{TiO}_2)_7^-$  at  $m/z$  560 (a) and  $(\text{TiO}_2)_8^-$   $m/z$  640 (b). Because of a wide window, the selected ion beam and as a consequence the signals of all ions, contained isotope signals.

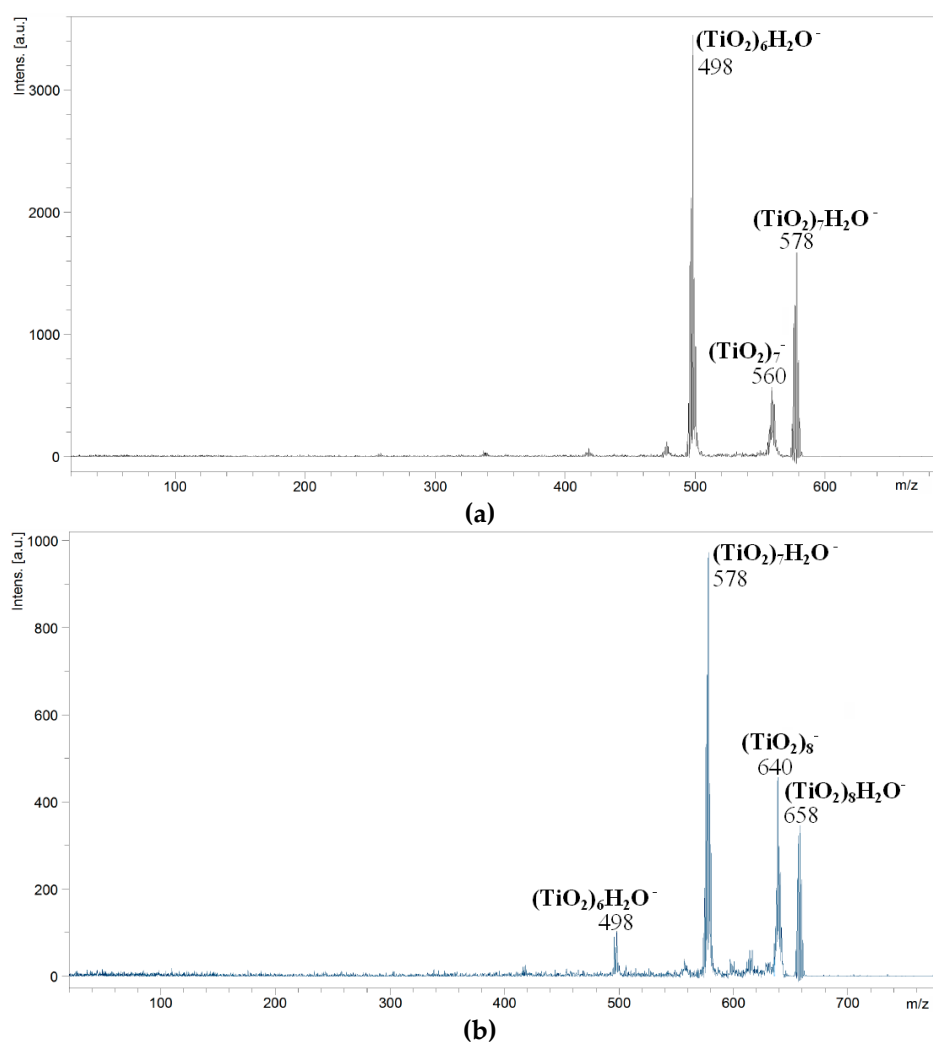

**Figure S10.** Exemplary LIFT mass spectra of  $(\text{TiO}_2)_n\text{OH}^-$  ions. The selected parent ions were  $(\text{TiO}_2)_7\text{OH}^-$  at  $m/z$  577 (a) and  $(\text{TiO}_2)_9\text{OH}^-$   $m/z$  657 (b). Because of a wide window, the selected ion beam and as a consequence the signals of all ions, contained isotope signals.
